# Supplementary material for: Computer-aided discovery of phenylpyrazole based amides as potent S6K1 inhibitors
Source: Royal Society of Chemistry journal article supplement (doi:10.1039/c9md00537d), 2020-01-01

## Computer-aided discovery of phenylpyrazole based amides as potent S6K1 inhibitors

Yan Yin,<sup>\*a</sup> Yuxing Sun,<sup>a</sup> Lianhua Zhao,<sup>a</sup> Jinpeng Pan<sup>a</sup> and Yangbo Feng<sup>b,c</sup>

<sup>a</sup> School of Chemical and Environmental Engineering, Shanghai Institute of Technology, 100 Hai Quan Rd., Shanghai, 201418, P. R. China

<sup>b</sup> Medicinal Chemistry, The Scripps Research Institute, 130 Scripps Way, Jupiter, Florida 33458, United States

<sup>c</sup> Reaction Biology Corporation, Malvern, PA 19355, United States

### <sup>1</sup>H NMR of **D1** in DMSO

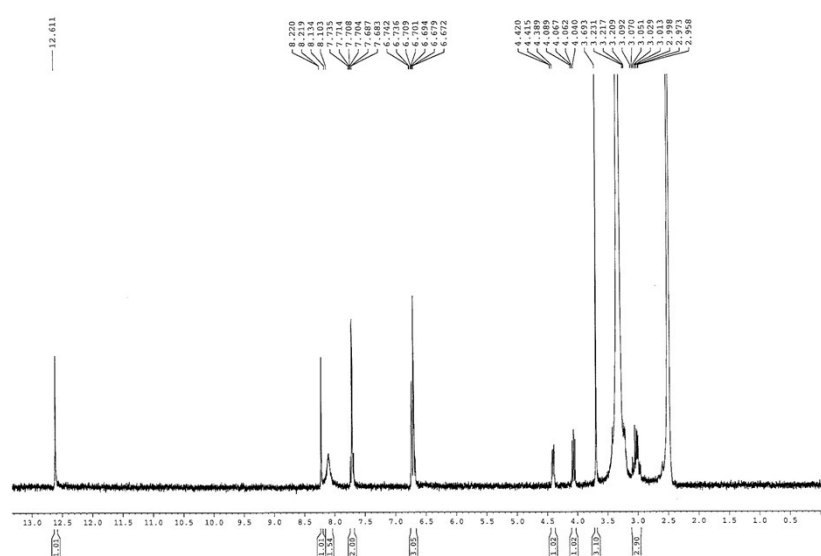

### <sup>13</sup>C NMR of **D1**

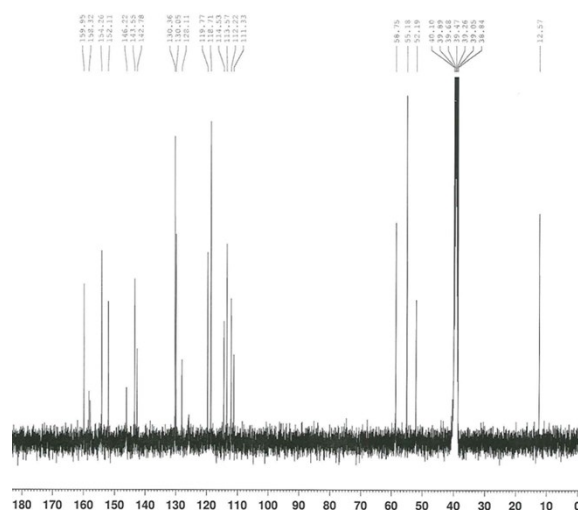

# <sup>1</sup>H NMR of D2

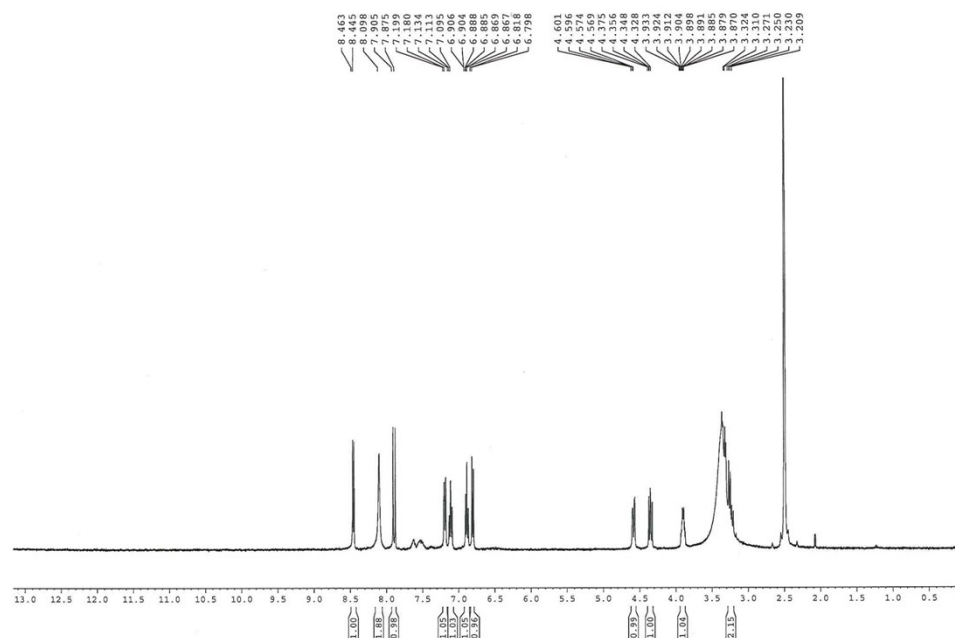

# <sup>13</sup>C NMR of D2

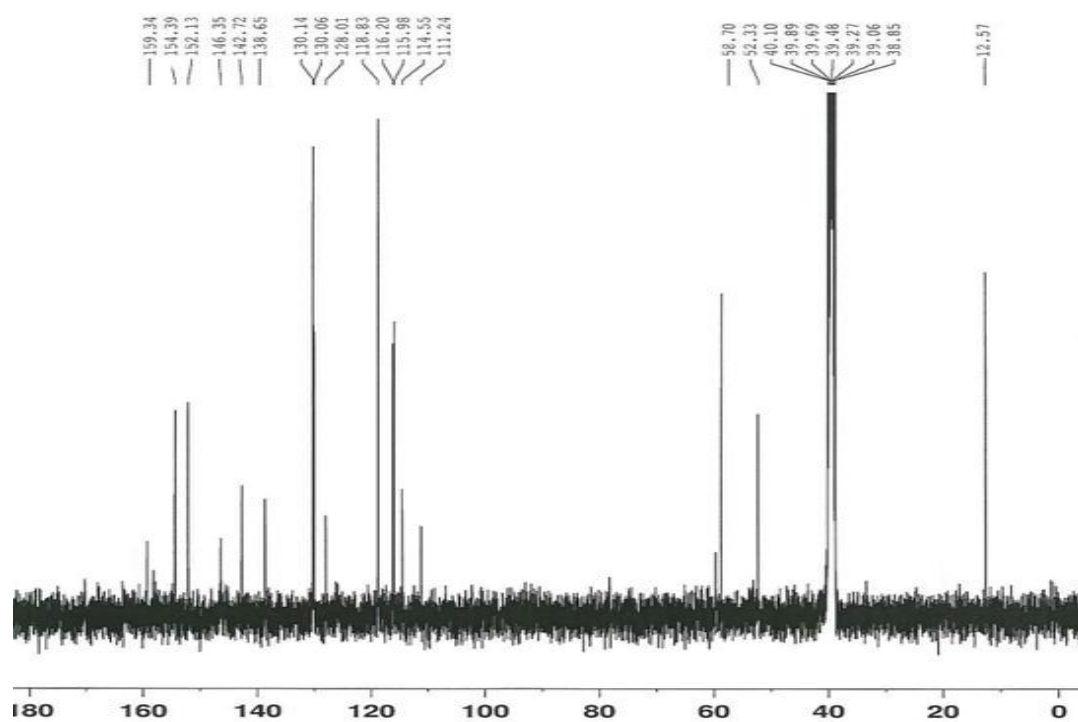

# <sup>1</sup>H NMR of D3

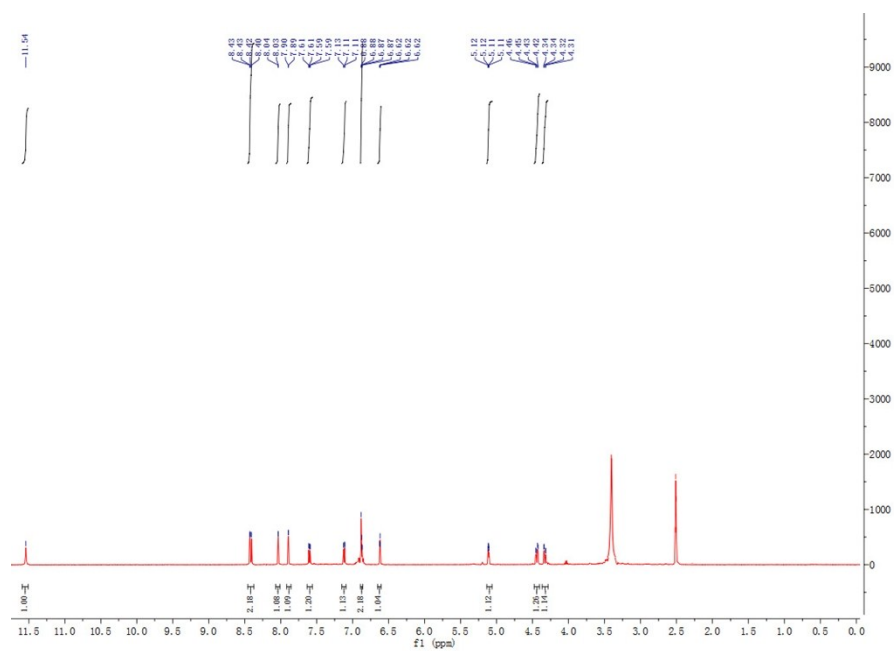

# <sup>13</sup>C NMR of D3

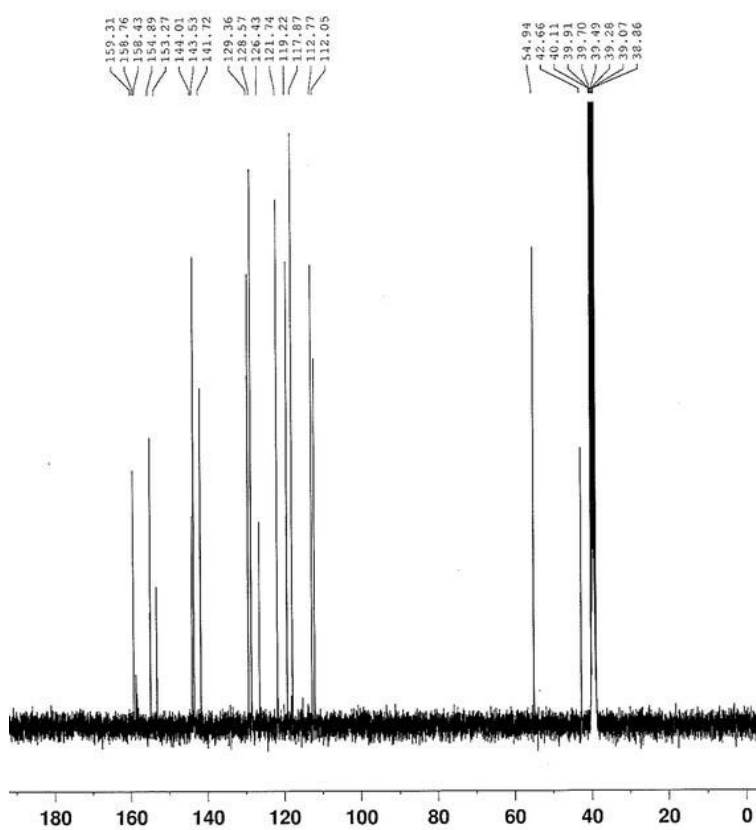

Supplement: c9md00537d1.pdf [file c9md00537d1.pdf]
